# Supplementary material for: Interference of CuO nanoparticles with metal homeostasis in hepatocytes under sub-toxic conditions
Source: Royal Society of Chemistry journal article supplement (doi:10.1039/c3nr05041f), 2013-11-22

## **Supplementary Information**

**to**

### **Interference of CuO nanoparticles with metal homeostasis in hepatocytes under sub-toxic conditions**

Martine Cuillel, Mireille Chevallet, Peggy Charbonnier, Caroline Fauquant, Isabelle Pignot-Paintrand, Josiane Arnaud, Doris Cassio, Isabelle Michaud-Soret and Elisabeth Mintz

**Table S1. Quantitative real time polymerase chain reaction primer sequences**

| Gene  | Forward primer sequence         | Reverse primer sequence         |
|-------|---------------------------------|---------------------------------|
| HMOX1 | ATG ACA CCA AGG ACC AGA GC      | GTG TAA GGA CCC ATC GGA GA      |
| HSPA6 | AGG AGG TGG AGA GGA TGG TT      | TGT CCT CTT CGG GAA TCT TG      |
| SOD1  | TGG CCG ATG TGT CTA TTG AA      | ACC TTT GCC CAA GTC ATC TG      |
| ZNT1  | CGC AGC CAT GGG GTG TTG GG      | CAT CGC CAG CGA GGT CA          |
| GCLM  | CCT CCT GCT GTG TGA TGC CAC     | CGT GCG CTT GAA TGT CAG GAA TGC |
| ATP7B | TGG CAA AGT CCC CAC AAT CAA C   | TCA AGG CAA CCA ACA CGG AGA G   |
| MTF1  | CGA AGG AGA AGC CAT TTG AG      | ATT TGC TGC AGC CTT CAG AT      |
| MET1X | GCT TCT CCT TGC CTC GAA A       | TGA CGT CCC TTT GCA GAT G       |
| 36B4  | GAA ATC CTG GGT GTC CGC AAT GTT | AGA CAA GGC CAG GAC TCG TTT GTA |
| HPRT  | ATG GAC AGG ACT GAA CGT CTT GCT | TTG AGC ACA CAG AGG GCT ACA ATG |

**Figure S1. Size distribution of CuO-NP** after sonication in water and coating with PVP-40. The population of CuO-NP is mono dispersed ( $PI\ 18.2 \pm 4.9$ ) and its mean diameter is  $175 \pm 9\text{ nm}$ . See reference (40) in the main text for SEM images of the powder.

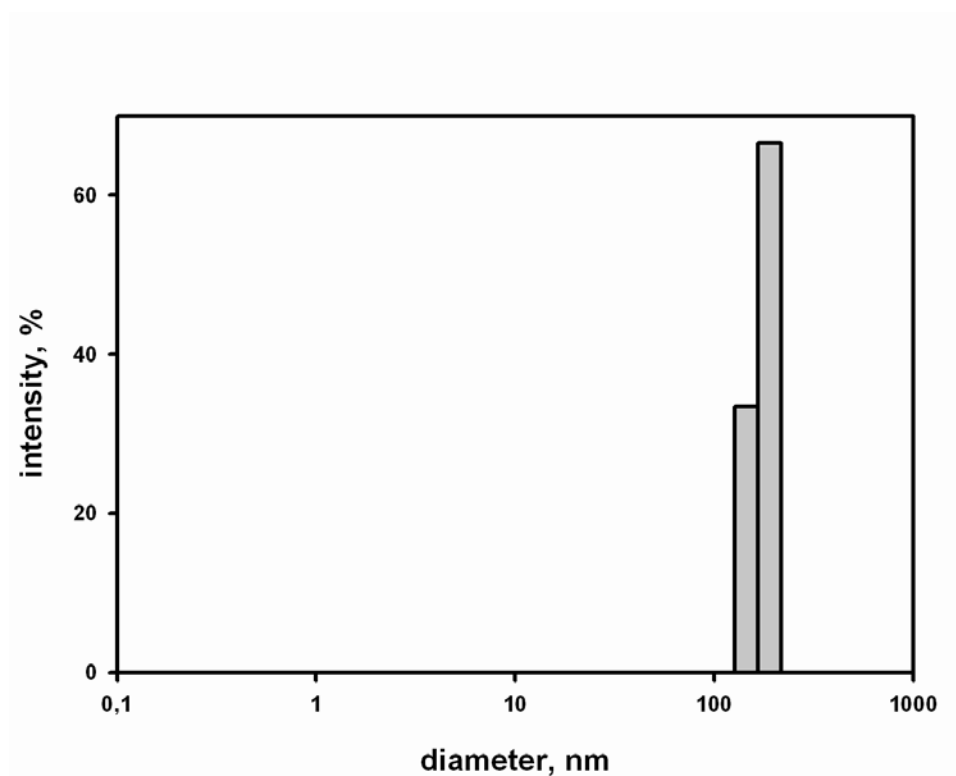

**Figure S2. SEM images of HepG2 cells after 24 h incubation with 250  $\mu$ M CuO-NP.**

On the left, low magnification of the cell shown in Figure 2. On the right, another cell with a lot of CuO-NP in contact with protrusions at one extremity, suggesting macropinocytosis.

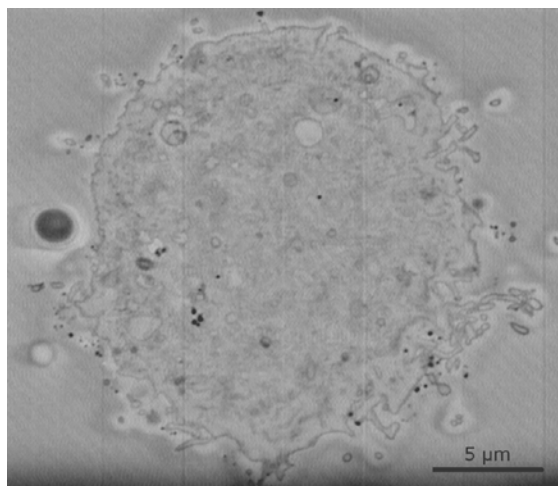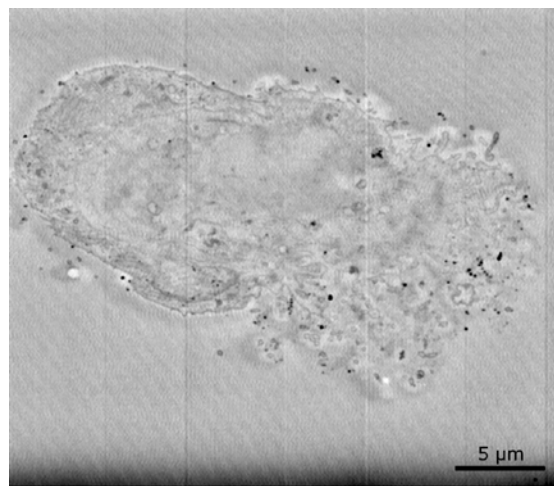

**Figure S3. qPCR and microarray measurements of ZNT1, GCLM, HSPA6, HMOX1 and MET1X mRNA from HepG2 cells.** The cells were exposed to copper salt or CuO-NP for various times at indicated concentrations :

□ 100  $\mu$ M Cu (1), ◇ 100  $\mu$ M Cu (2), ▽ 200  $\mu$ M Cu (2), △ 400  $\mu$ M Cu (2)

○ 60 $\mu$ M and 250  $\mu$ M Cu (this study, Fig. 5), ● 60 $\mu$ M & 250  $\mu$ M CuO-NP (this study, Fig. 5)

(1) P. Muller, H. van Bakel, B. van de Sluis, F. Holstege, C. Wijmenga and L. W. Klomp, *J Biol Inorg Chem*, 2007, **12**, 495.

(2) M. O. Song, J. Li and J. H. Freedman, *Physiological genomics*, 2009, **38**, 386.

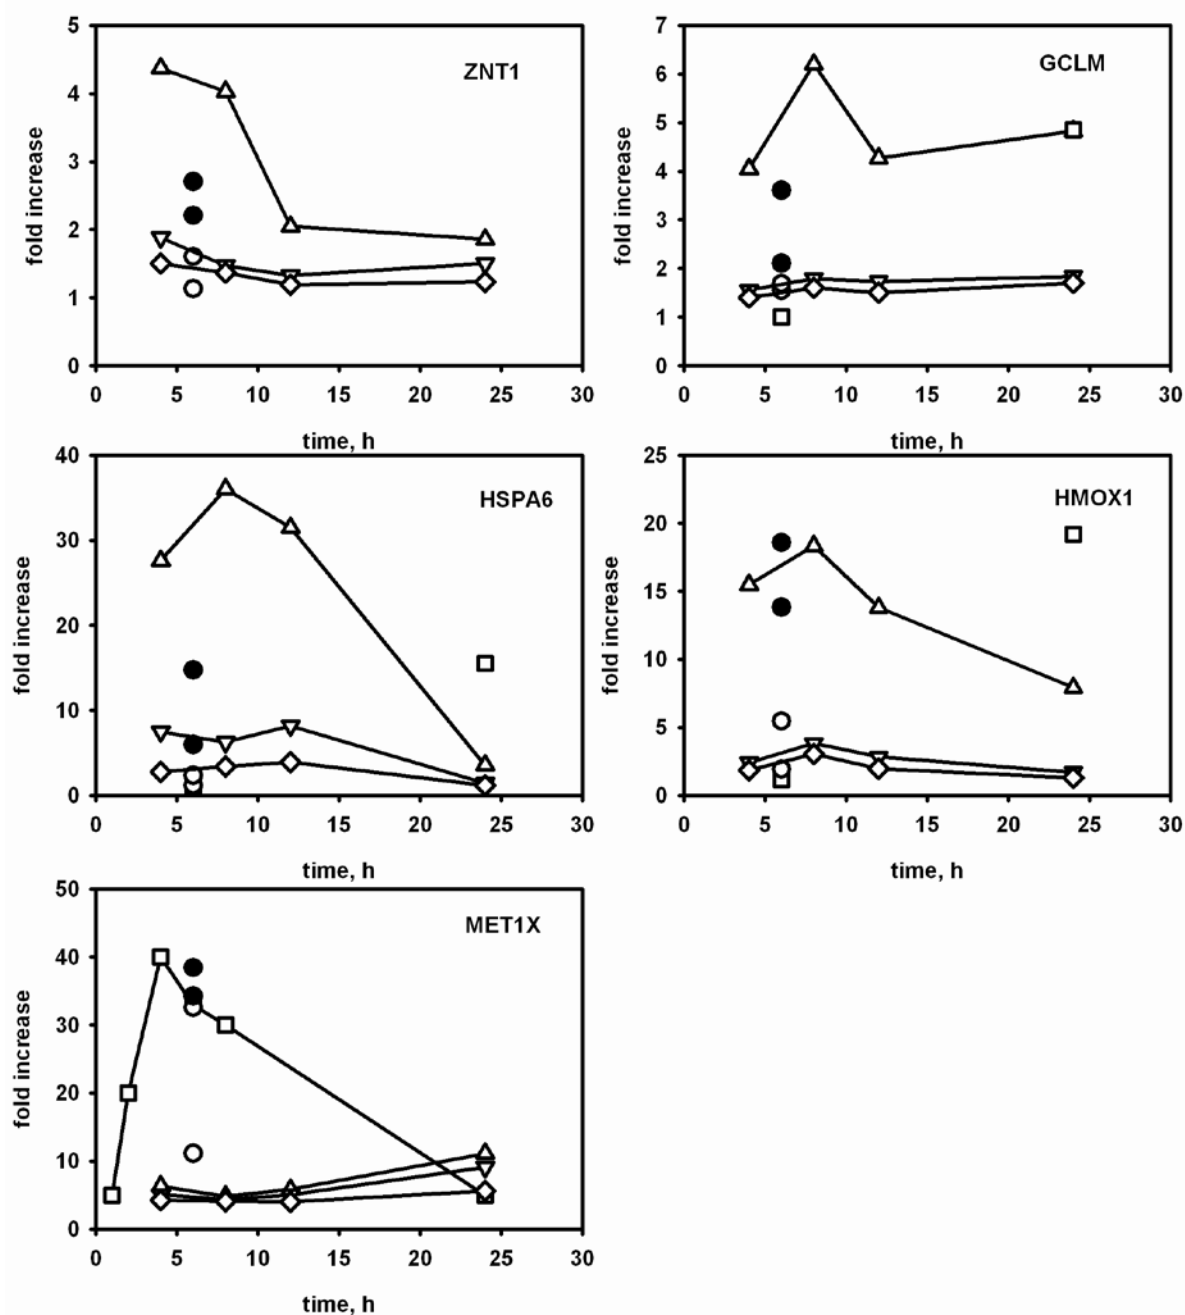

Supplement: c3nr05041f.pdf [file c3nr05041f.pdf]
